# Supplementary material for: A hybrid de novo genome assembly of the honeybee, Apis mellifera, with chromosome-length scaffolds
Source: PubMed Central journal article supplement (PMC6454739; doi:10.1186/s12864-019-5642-0), 2019-04-08

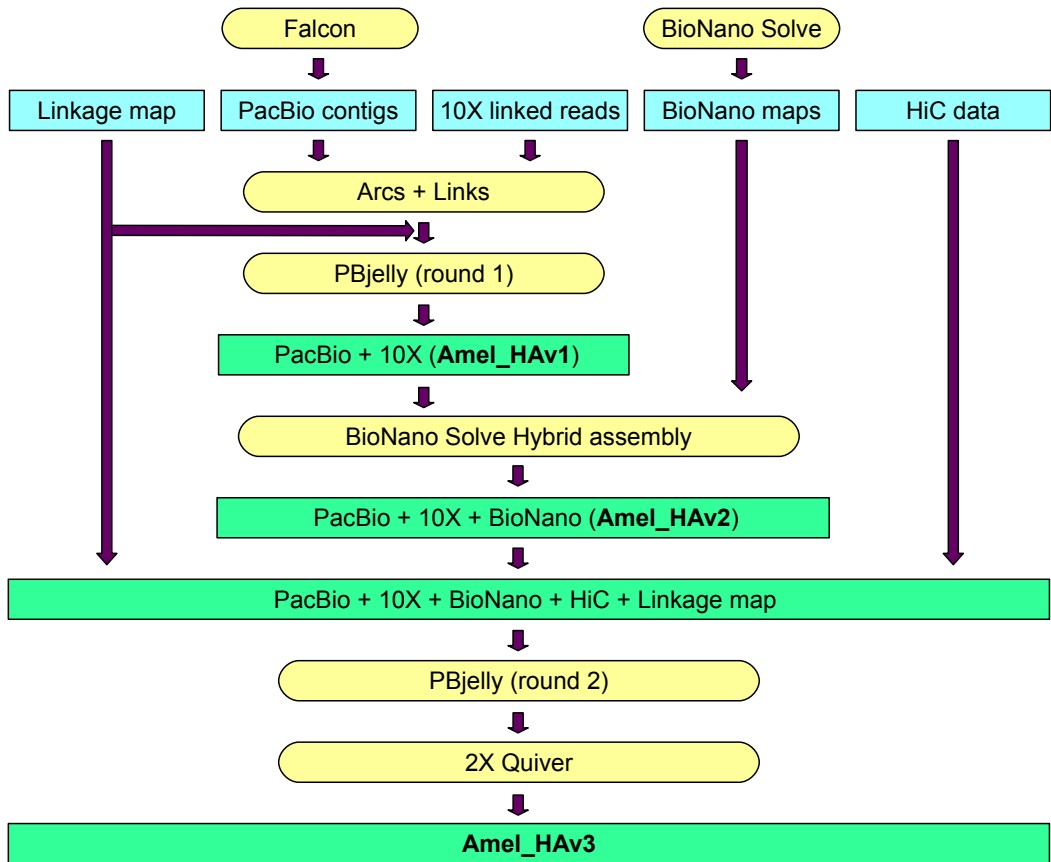

Supplement: 12864_2019_5642_MOESM6_ESM.pdf [file 12864_2019_5642_MOESM6_ESM.pdf]
